# Supplementary material for: Association of multiple mineral and vitamin B group intake with blood glucose using quantile regression analysis: NHANES 2007–2014
Source: PubMed Central journal article supplement (PMC6958618; doi:10.29219/fnr.v63.3560), 2019-12-03
Supplement: FNR-63-3560-s001.pdf [file FNR-63-3560-s001.pdf]

# Mineral and Vitamin B Group Intake and Blood Glucose

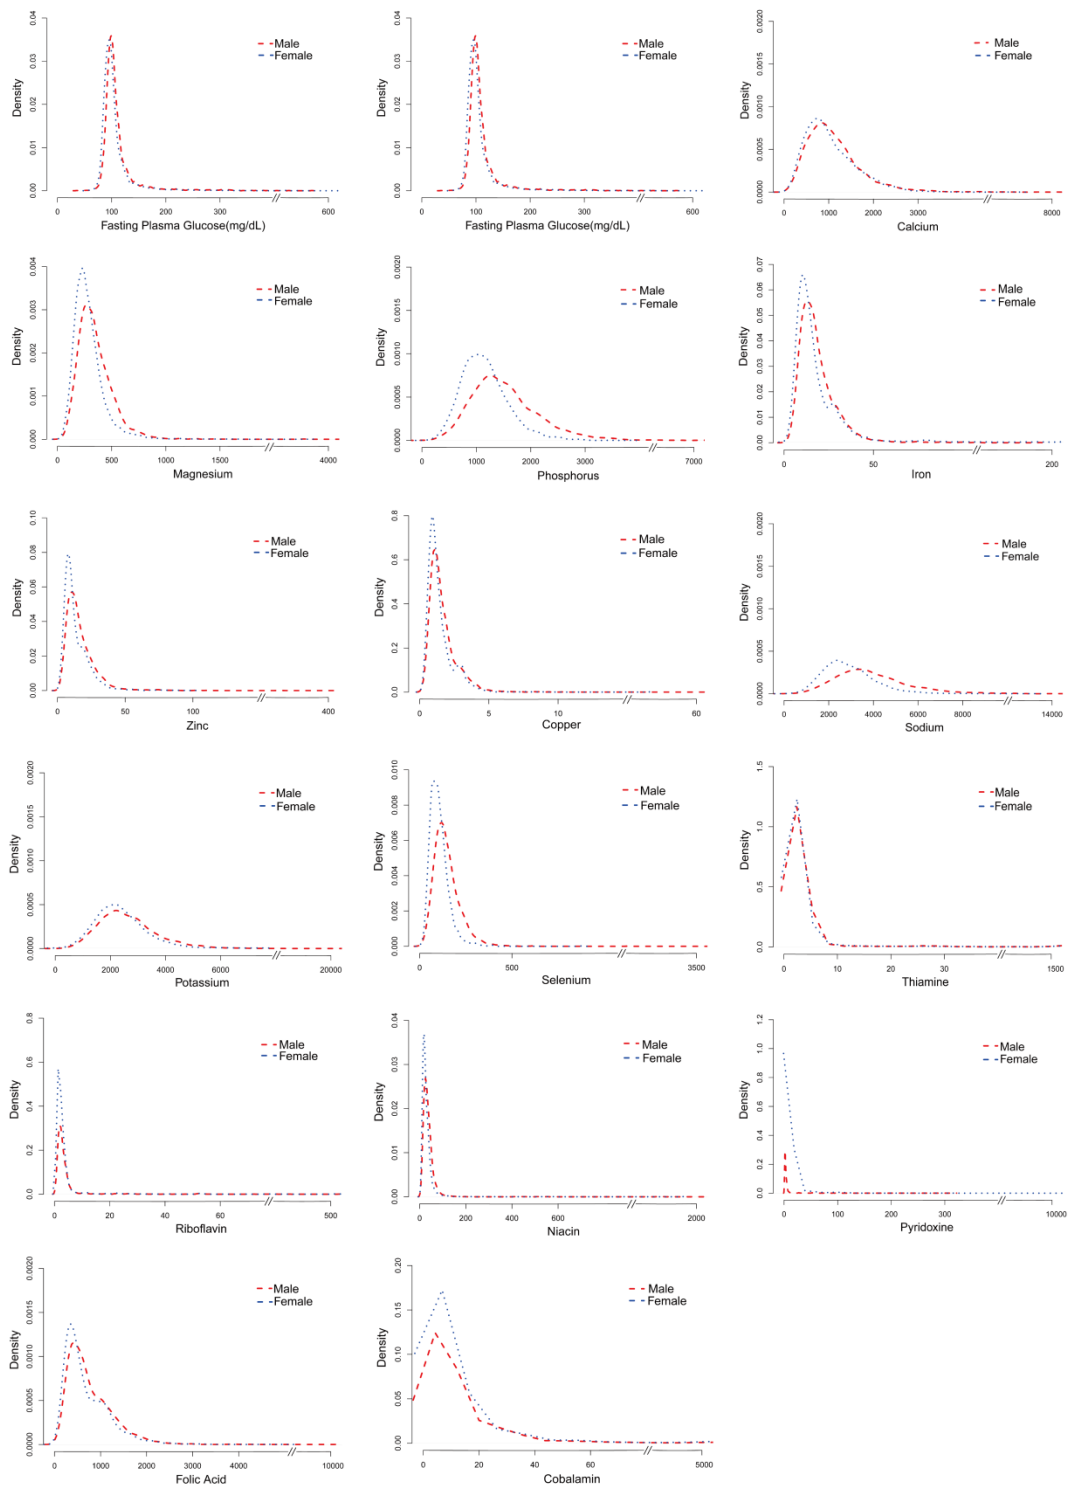

Fig S1 Density plot of the vitamin B group and mineral intake, and FPG of participants by gender.

# Mineral and Vitamin B Group Intake and Blood Glucose

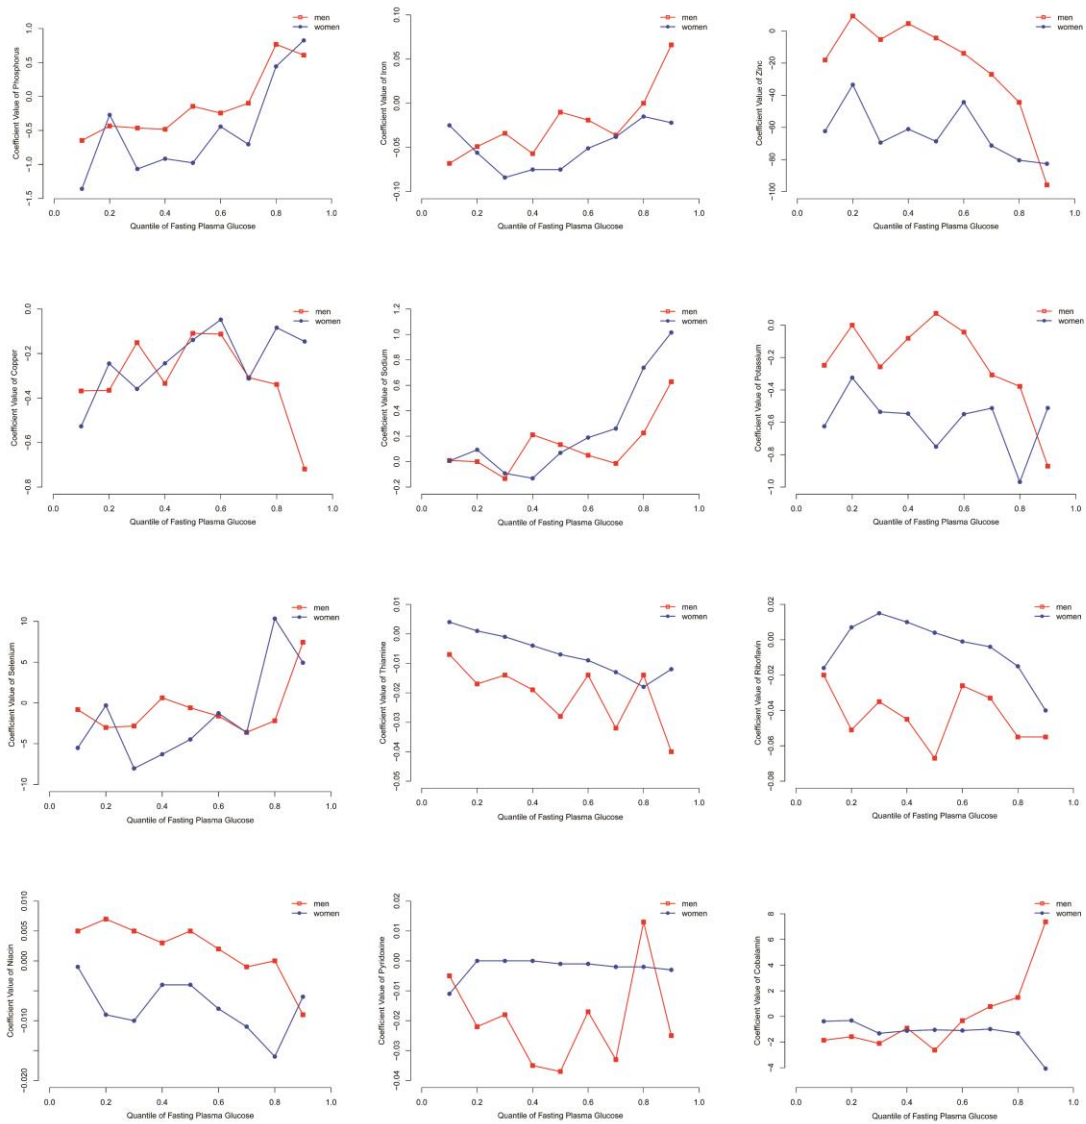

Fig S2 Association between FPG and the intake of other mineral and vitamin B group for male and female.



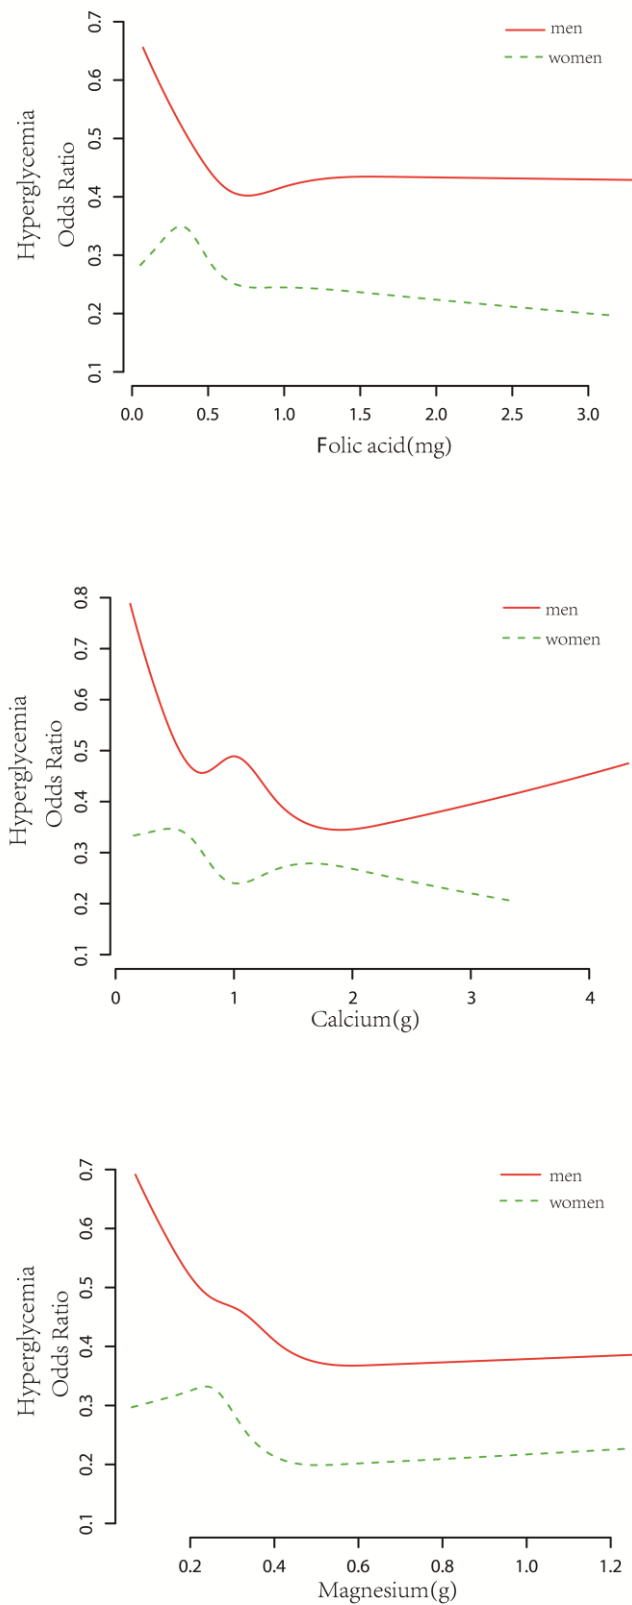

Figure S3 Association between the risk of hyperglycemia and the intake of folic acid, calcium and magnesium for male and female.

**Table S1** QR coefficients between FPG and other B vitamin group intake for males<sup>#</sup>.

|                                    | 0.1                        | 0.2                        | 0.3                        | 0.4                        | 0.5                      | 0.6                        | 0.7                      | 0.8                      | 0.9                      |
|------------------------------------|----------------------------|----------------------------|----------------------------|----------------------------|--------------------------|----------------------------|--------------------------|--------------------------|--------------------------|
| Thiamine(VB <sub>1</sub> )(mg)     | -0.007<br>(-0.085,0.000)   | -0.017<br>(-0.071,0.001)   | -0.014<br>(-0.063,0.003)   | -0.019*<br>(-0.051,-0.006) | -0.028<br>(-0.058,0.016) | -0.014*<br>(-0.054,-0.004) | -0.032<br>(-0.048,0.043) | -0.014<br>(-0.063,0.069) | -0.040<br>(-0.076,0.097) |
| Riboflavin(VB <sub>2</sub> )(mg)   | -0.020*<br>(-0.147,-0.002) | -0.051<br>(-0.103,0.007)   | -0.035<br>(-0.114,0.001)   | -0.045*<br>(-0.087,-0.025) | -0.067<br>(-0.095,0.025) | -0.026<br>(-0.121,0.010)   | -0.033<br>(-0.119,0.041) | -0.055<br>(-0.152,0.055) | -0.055<br>(-0.120,0.172) |
| Niacin (VB <sub>3</sub> ) (mg)     | 0.005<br>(-0.107,0.009)    | 0.007<br>(-0.063,0.013)    | 0.005<br>(-0.020,0.012)    | 0.003<br>(-0.007,0.010)    | 0.005*<br>(0.001,0.009)  | 0.002<br>(0.000,0.007)     | -0.001<br>(-0.002,0.004) | 0.000<br>(-0.004,0.029)  | -0.009<br>(-0.011,0.370) |
| Pyridoxine (VB <sub>6</sub> ) (mg) | -0.005<br>(-0.123,0.018)   | -0.022<br>(-0.097,0.009)   | -0.018*<br>(-0.073,-0.004) | -0.035*<br>(-0.054,-0.002) | -0.037<br>(-0.067,0.028) | -0.017<br>(-0.078,0.017)   | -0.033<br>(-0.073,0.028) | 0.013<br>(-0.085,0.023)  | -0.025<br>(-0.044,0.058) |
| Cobalamin(VB <sub>12</sub> ) (mcg) | -1.857<br>(-5.112,0.697)   | -1.581*<br>(-5.762,-0.789) | -2.107<br>(-6.143,1.756)   | -0.913<br>(-5.245,1.039)   | -2.627<br>(-5.083,4.257) | -0.330<br>(-5.978,3.608)   | 0.772<br>(-5.814,8.863)  | 1.478<br>(-2.957,19.362) | 7.385<br>(-4.607,62.893) |

<sup>#</sup>Adjusted for age, income, education, race, smoking and alcohol consumption.

\* $p < 0.05$ .

**Table S2** QR coefficients between FPG and other B vitamin group intake for females<sup>#</sup>

|                                    | 0.1                      | 0.2                      | 0.3                      | 0.4                      | 0.5                        | 0.6                        | 0.7                        | 0.8                      | 0.9                        |
|------------------------------------|--------------------------|--------------------------|--------------------------|--------------------------|----------------------------|----------------------------|----------------------------|--------------------------|----------------------------|
| Thiamine(VB <sub>1</sub> )(mg)     | 0.004<br>(-0.116,0.004)  | 0.001<br>(-0.034,0.007)  | -0.001<br>(-0.034,0.020) | -0.004<br>(-0.027,0.012) | -0.007<br>(-0.037,0.017)   | -0.009<br>(-0.038,0.023)   | -0.013<br>(-0.044,0.063)   | -0.018<br>(-0.019,0.063) | -0.012<br>(-0.032,0.052)   |
| Riboflavin(VB <sub>2</sub> )(mg)   | -0.016<br>(-0.692,0.036) | 0.007<br>(-0.080,0.025)  | 0.015<br>(-0.078,0.019)  | 0.010<br>(-0.042,0.015)  | 0.004<br>(-0.051,0.007)    | -0.001<br>(-0.047,0.001)   | -0.004*<br>(-0.057,-0.004) | -0.015<br>(-0.067,0.106) | -0.040<br>(-0.040,0.178)   |
| Niacin (VB <sub>3</sub> ) (mg)     | -0.001<br>(-0.071,0.001) | -0.009<br>(-0.025,0.011) | -0.010<br>(-0.015,0.006) | -0.004<br>(-0.019,0.008) | -0.004<br>(-0.023,0.002)   | -0.008<br>(-0.023,0.002)   | -0.011<br>(-0.023,0.001)   | -0.016<br>(-0.024,0.012) | -0.006*<br>(-0.032,-0.001) |
| Pyridoxine (VB <sub>6</sub> ) (mg) | -0.011<br>(-0.933,0.000) | 0.000<br>(-0.098,0.000)  | 0.000<br>(-0.077,0.000)  | 0.000<br>(-0.044,0.000)  | -0.001*<br>(-0.045,-0.001) | -0.001*<br>(-0.045,-0.001) | -0.002<br>(-0.051,0.014)   | -0.002<br>(-0.045,0.106) | -0.003<br>(-0.003,1.298)   |
| Cobalamin(VB <sub>12</sub> ) (mcg) | -0.380<br>(-6.245,1.130) | -0.318<br>(-2.208,1.406) | -1.324<br>(-3.220,0.901) | -1.118<br>(-3.873,0.939) | -1.047<br>(-4.158,0.955)   | -1.099<br>(-3.088,0.401)   | -0.987<br>(-3.673,0.032)   | -1.315<br>(-4.752,3.731) | -4.069<br>(-4.447,7.963)   |

<sup>#</sup>Adjusted for age, income, education, race, smoking and alcohol consumption.

\* $p < 0.05$ .

**Table S3** QR coefficients between FPG and other mineral intake for males<sup>#</sup>

|               | 0.1                         | 0.2                        | 0.3                        | 0.4                        | 0.5                        | 0.6                         | 0.7                         | 0.8                         | 0.9                         |
|---------------|-----------------------------|----------------------------|----------------------------|----------------------------|----------------------------|-----------------------------|-----------------------------|-----------------------------|-----------------------------|
| Phosphorus(g) | -0.647<br>(-1.189,0.812)    | -0.434<br>(-1.152,0.216)   | -0.464<br>(-1.502,0.034)   | -0.482<br>(-1.183,0.758)   | -0.145<br>(-1.213,0.725)   | -0.244<br>(-1.210,1.140)    | -0.099<br>(-1.260,1.573)    | 0.766<br>(-0.519,2.021)     | 0.608<br>(-1.361,3.924)     |
| Iron (mg)     | -0.068*<br>(-0.102,-0.011)  | -0.049*<br>(-0.085,-0.004) | -0.034<br>(-0.101,0.001)   | -0.057*<br>(-0.080,-0.005) | -0.010<br>(-0.080,0.030)   | -0.019<br>(-0.077,0.011)    | -0.036<br>(-0.080,0.030)    | 0.000<br>(-0.080,0.121)     | 0.066<br>(-0.147,0.248)     |
| Zinc (g)      | -18.039<br>(-98.074,30.100) | 9.291<br>(-67.194,20.776)  | -5.336<br>(-34.540,11.819) | 4.609<br>(-48.768,15.577)  | -4.429<br>(-18.187,21.838) | -13.901<br>(-33.378,21.597) | -27.058<br>(-45.616,37.699) | -44.430<br>(-65.512,46.152) | -95.778<br>(-97.878,76.240) |
| Copper(mg)    | -0.368<br>(-1.207,0.228)    | -0.365<br>(-1.188,0.155)   | -0.151<br>(-1.064,0.089)   | -0.334<br>(-0.877,0.035)   | -0.109<br>(-0.960,0.033)   | -0.113<br>(-0.834,0.074)    | -0.308*<br>(-0.640,-0.201)  | -0.339*<br>(-0.839,-0.261)  | -0.719<br>(-1.160,0.017)    |
| Sodium (g)    | 0.009<br>(-0.468,0.372)     | 0.000<br>(-0.263,0.247)    | -0.133<br>(-0.380,0.252)   | 0.211<br>(-0.326,0.485)    | 0.134<br>(-0.230,0.469)    | 0.050<br>(-0.368,0.443)     | -0.014<br>(-0.291,0.490)    | 0.225<br>(-0.240,0.680)     | 0.628<br>(-0.342,2.303)     |
| Potassium (g) | -0.248<br>(-0.825,0.469)    | 0.000<br>(-0.491,0.272)    | -0.257<br>(-0.721,0.291)   | -0.081<br>(-0.429,0.465)   | 0.073<br>(-0.479,0.395)    | -0.043<br>(-0.592,0.337)    | -0.307<br>(-0.735,0.246)    | -0.378<br>(-0.808,0.326)    | -0.871<br>(-1.628,0.257)    |
| Selenium (mg) | -0.821<br>(-9.572,4.165)    | -3.018<br>(-12.484,2.798)  | -2.827<br>(-10.296,1.602)  | 0.627<br>(-7.014,4.488)    | -0.598<br>(-2.970,6.314)   | -1.609<br>(-3.450,6.736)    | -3.604<br>(-6.143,9.902)    | -2.185<br>(-6.099,15.948)   | 7.435<br>(-12.927,48.773)   |

<sup>#</sup> Adjusted for age, income, education, race, smoking and alcohol consumption.

\* $p < 0.05$ .

**Table S4** QR coefficients between FPG and other mineral intake for females<sup>#</sup>

|               | 0.1                           | 0.2                        | 0.3                            | 0.4                            | 0.5                        | 0.6                          | 0.7                           | 0.8                          | 0.9                          |
|---------------|-------------------------------|----------------------------|--------------------------------|--------------------------------|----------------------------|------------------------------|-------------------------------|------------------------------|------------------------------|
| Phosphorus(g) | -1.358<br>(-2.511,0.252)      | -0.271<br>(-1.409,0.640)   | -1.066*<br>(-1.960,-0.024)     | -0.916<br>(-1.745,0.034)       | -0.976<br>(-2.051,0.179)   | -0.443<br>(-1.584,0.490)     | -0.703<br>(-1.903,0.900)      | 0.442<br>(-2.064,3.174)      | 0.825<br>(-1.920,3.735)      |
| Iron (mg)     | -0.025<br>(-0.084,0.010)      | -0.056<br>(-0.067,0.027)   | -0.084*<br>(-0.094,-0.041)     | -0.075<br>(-0.118,0.039)       | -0.075*<br>(-0.111,-0.035) | -0.051<br>(-0.100,0.010)     | -0.038<br>(-0.084,0.020)      | -0.015<br>(-0.082,0.047)     | -0.022<br>(-0.068,0.131)     |
| Zinc (g)      | -62.351*<br>(-83.498,-25.067) | -33.482<br>(-97.716,0.743) | -69.468*<br>(-103.583,-43.692) | -61.087*<br>(-104.757,-25.960) | -68.672<br>(-93.797,3.408) | -44.321<br>(-100.158,16.794) | -71.312*<br>(-120.308,-9.351) | -80.464<br>(-200.396,20.138) | -82.616<br>(-255.340,30.955) |
| Copper(mg)    | -0.527<br>(-1.411,0.168)      | -0.245<br>(-0.674,0.242)   | -0.359<br>(-0.874,0.034)       | -0.244<br>(-0.737,0.151)       | -0.139<br>(-0.712,0.249)   | -0.048<br>(-0.527,0.482)     | -0.312<br>(-0.796,0.439)      | -0.084<br>(-1.222,1.260)     | -0.146<br>(-1.225,1.708)     |
| Sodium (g)    | 0.006<br>(-0.656,0.417)       | 0.093<br>(-0.229,0.439)    | -0.092<br>(-0.413,0.260)       | -0.131<br>(-0.473,0.348)       | 0.069<br>(-0.372,0.650)    | 0.189<br>(-0.183,0.603)      | 0.260<br>(-0.306,0.999)       | 0.738<br>(-0.182,1.318)      | 1.015<br>(-0.212,2.704)      |
| Potassium (g) | -0.626<br>(-1.162,0.073)      | -0.326<br>(-1.217,0.138)   | -0.537*<br>(-0.949,-0.109)     | -0.548*<br>(-1.071,-0.096)     | -0.752<br>(-1.134,0.042)   | -0.551<br>(-0.938,0.022)     | -0.514<br>(-1.236,0.069)      | -0.970<br>(-1.801,0.234)     | -0.513<br>(-1.663,0.984)     |
| Selenium (mg) | -5.512<br>(-14.036,5.361)     | -0.305<br>(-5.647,7.857)   | -8.027<br>(-14.749,1.502)      | -6.297<br>(-14.880,2.257)      | -4.472<br>(-15.075,7.098)  | -1.261<br>(-9.052,6.811)     | -3.629<br>(-12.259,13.145)    | 10.334<br>(-15.636,36.920)   | 4.934<br>(-14.238,39.145)    |

<sup>#</sup> Adjusted for age, income, education, race, smoking and alcohol consumption.\* $p < 0.05$ .
